# Supplementary material for: FBXO10 prevents chronic unpredictable stress‐induced behavioral despair and cognitive impairment through promoting RAGE degradation
Source: PubMed Central journal article supplement (PMC8611766; doi:10.1111/cns.13727), 2021-09-07
Supplement: CNS-27-1504-s001.pdf [file CNS-27-1504-s001.pdf]

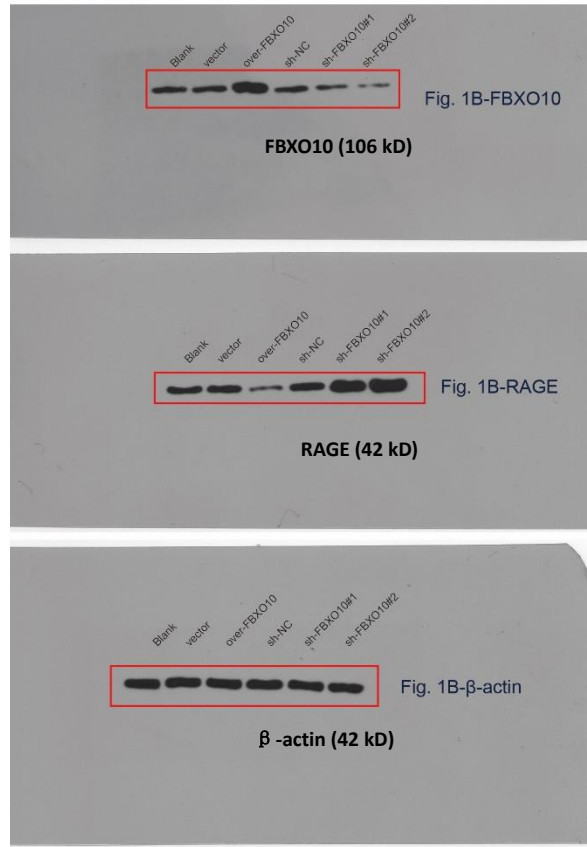

Full unedited blot for Figure 1B

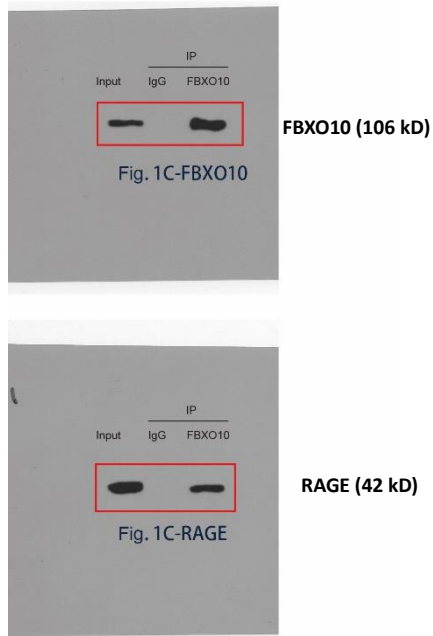

Full unedited blot for Figure 1C

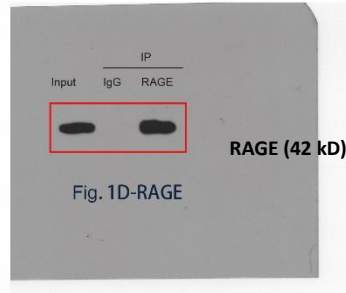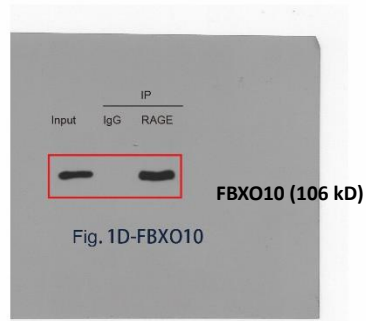

Full unedited blot for Figure 1D

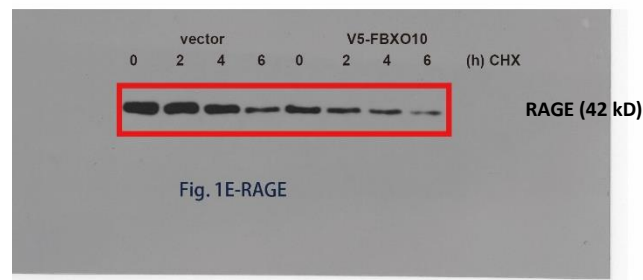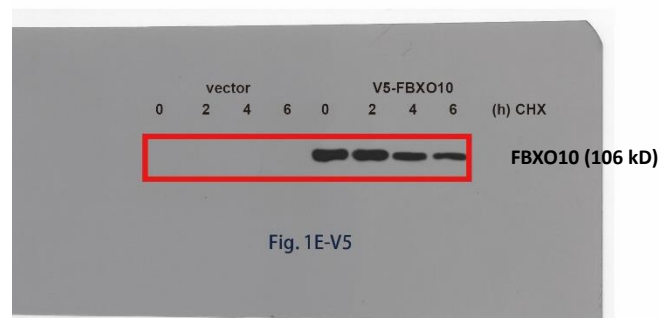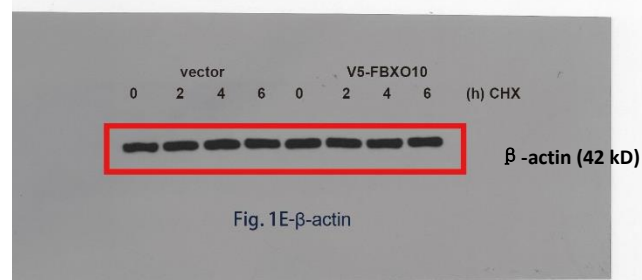

Full unedited blot for Figure 1E

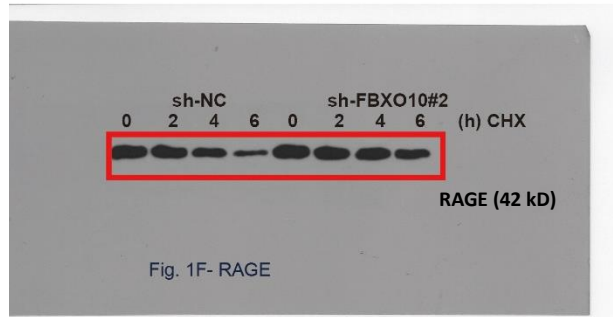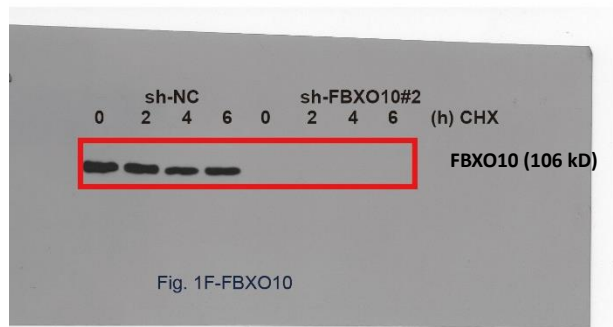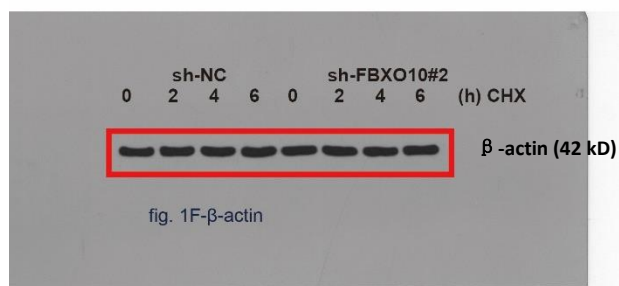

Full unedited blot for Figure 1F

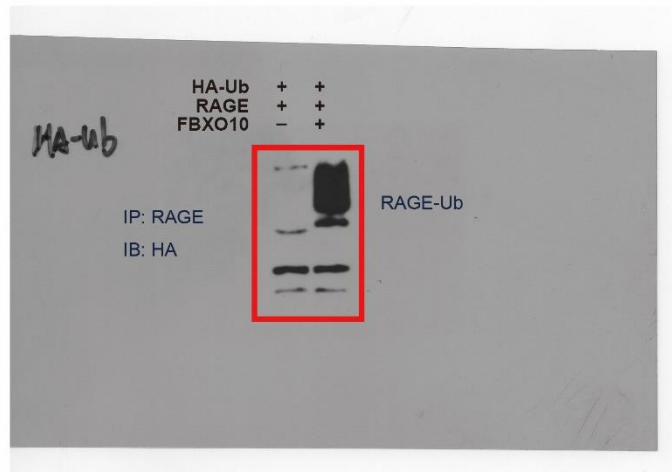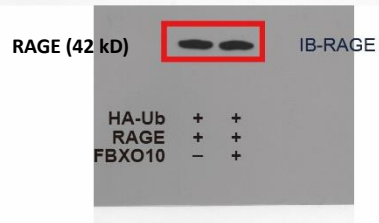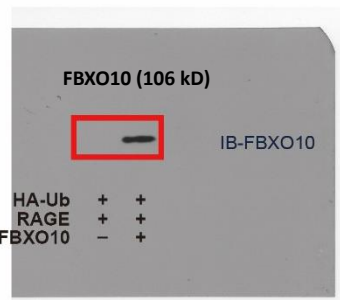

Full unedited blot for Figure 1G

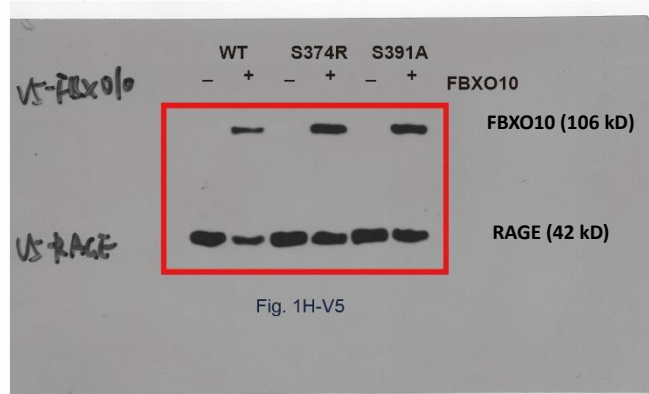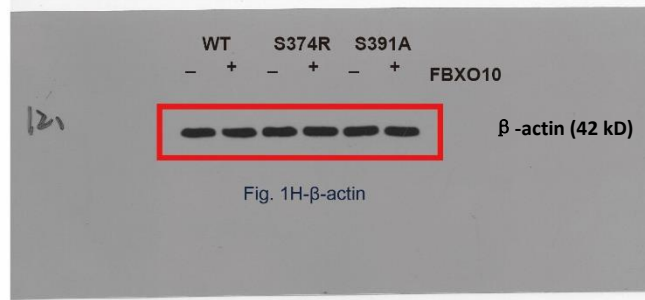

Full unedited blot for Figure 1H

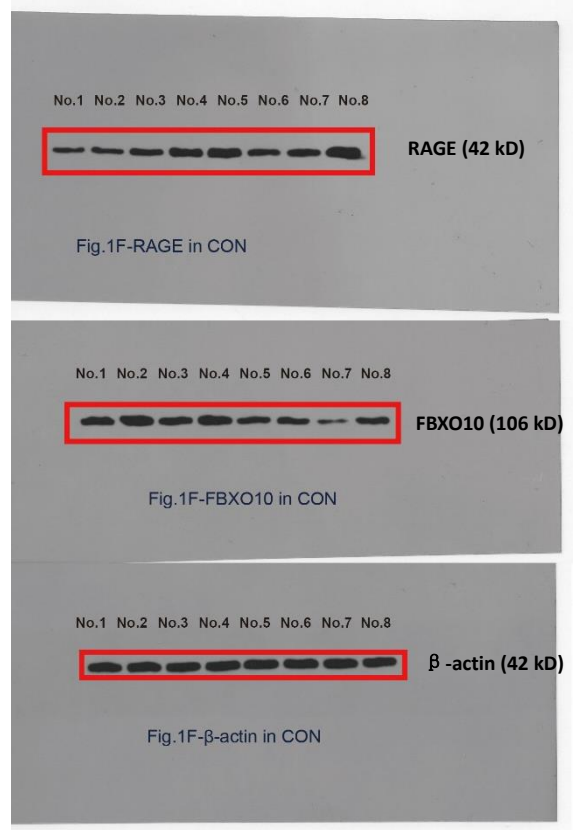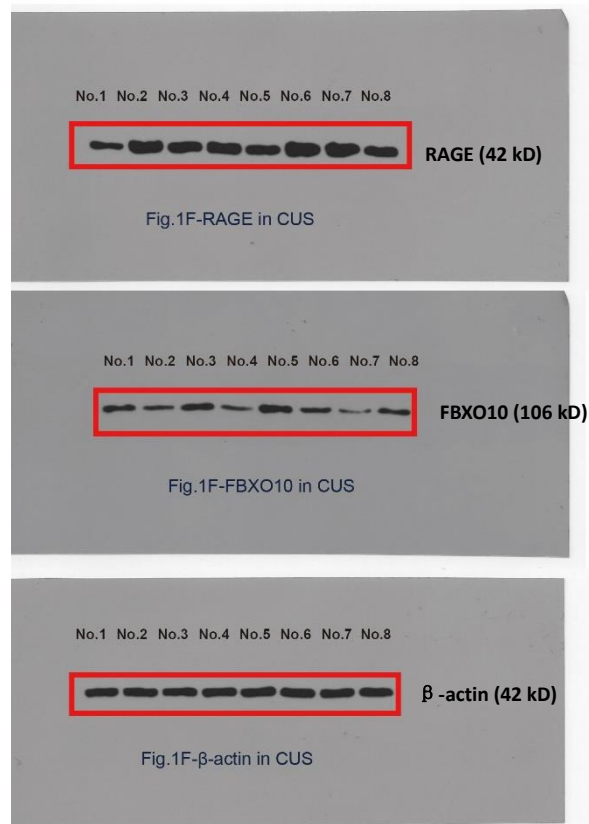

Full unedited blot for Figure 2F

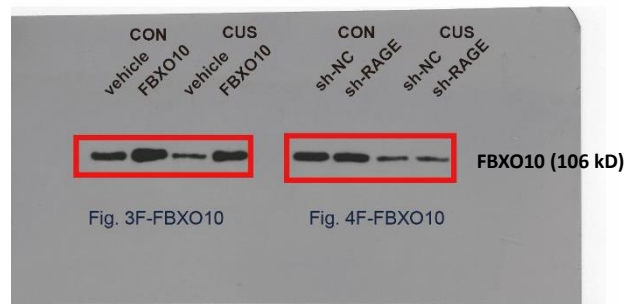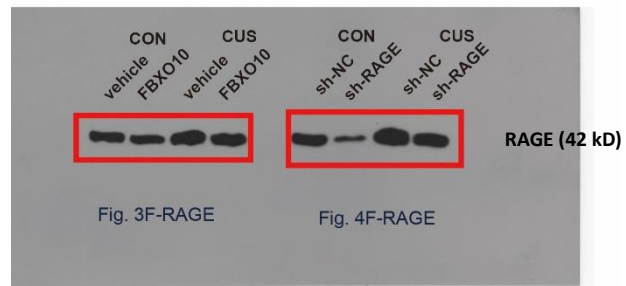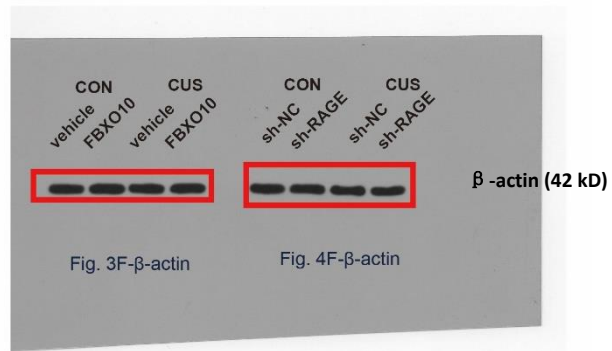

Full unedited blot for Figure 3F and 4F

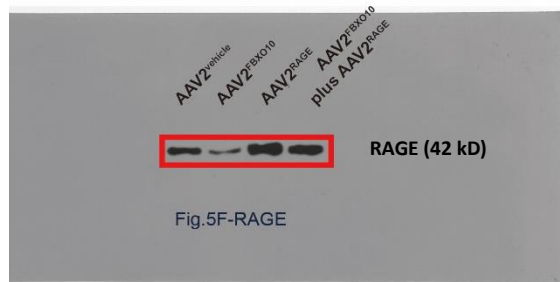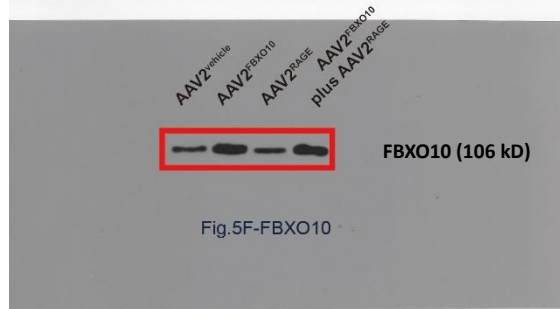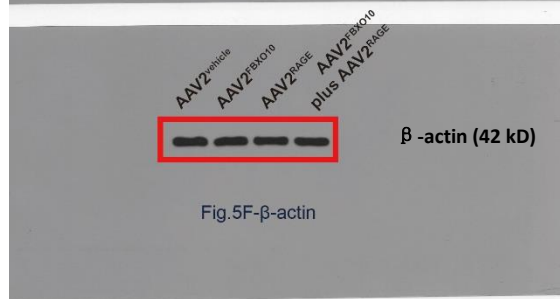

Full unedited blot for Figure 5F



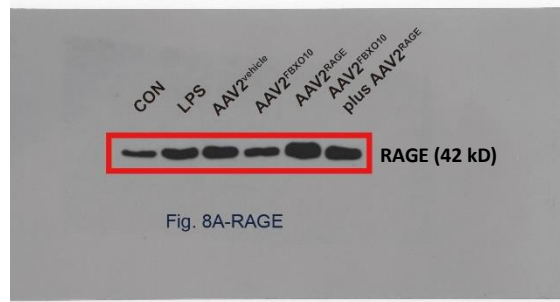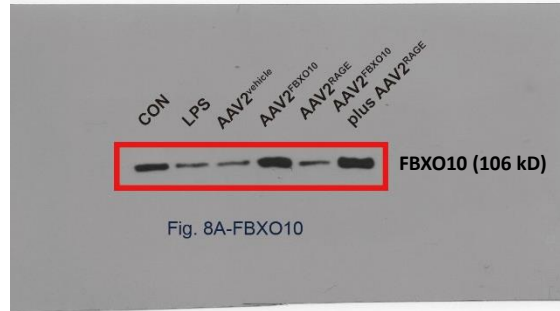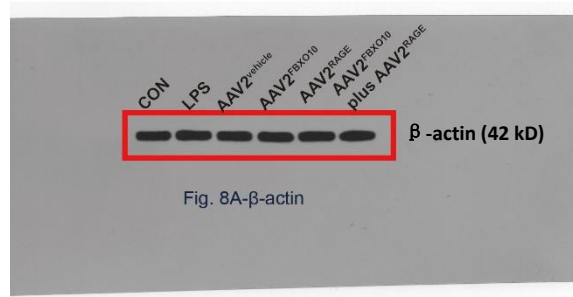

Full unedited blot for Figure 8A

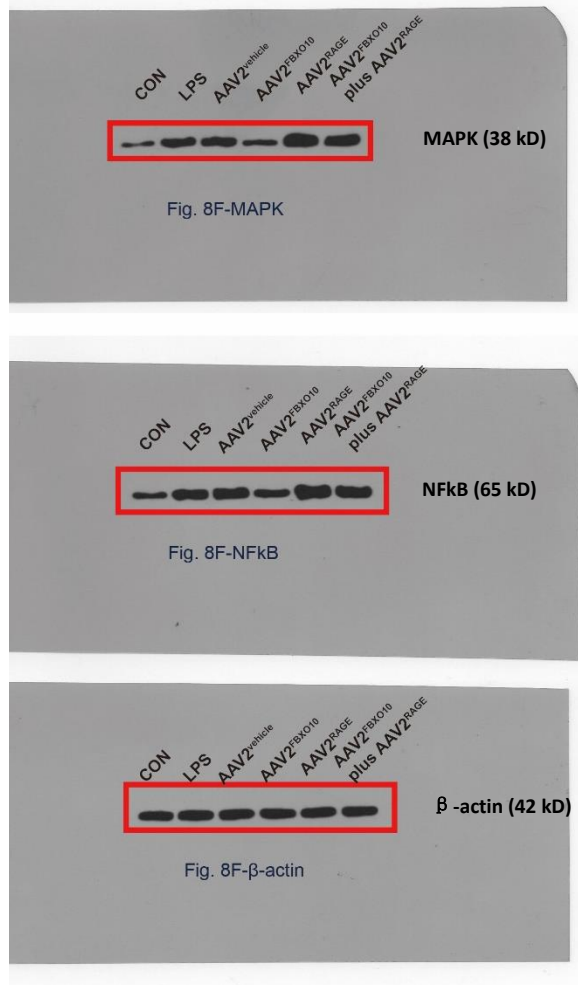

Full unedited blot for Figure 8F
